# Supplementary material for: Antioral Cancer Effects by the Nitrated [6,6,6]Tricycles Compound (SK1) In Vitro
Source: MDPI journal article supplement (doi:10.3390/antiox11102072), 2022-10-20
Supplement: s1 [file s1]

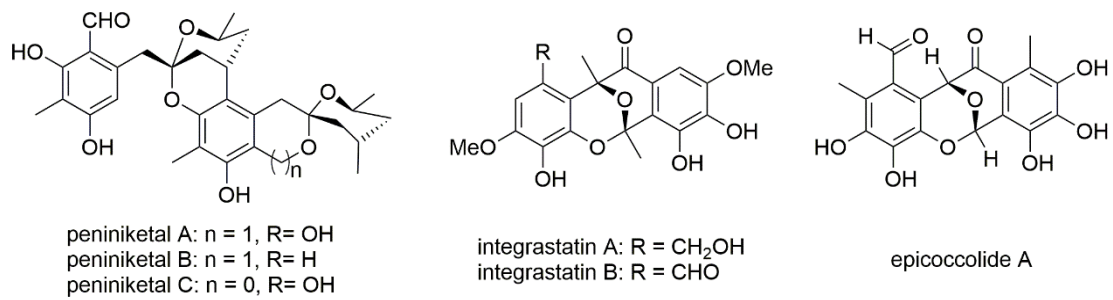

**Supplementary Figure S1.** Structure of peniciketals A–C, integrastatins A and B, and epicoccolide A mentioned in the introduction.

YL1051028  
Pulse Sequence: s2pu1  
UNITYplus-400 "unity400"  
Date: Nov 1 2016  
Solvent: CDCl3  
Ambient temperature  
Total 32 repetitions

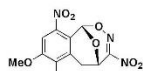

Compound 1g

<sup>1</sup>H NMR (400 MHz, CDCl<sub>3</sub>) spectra

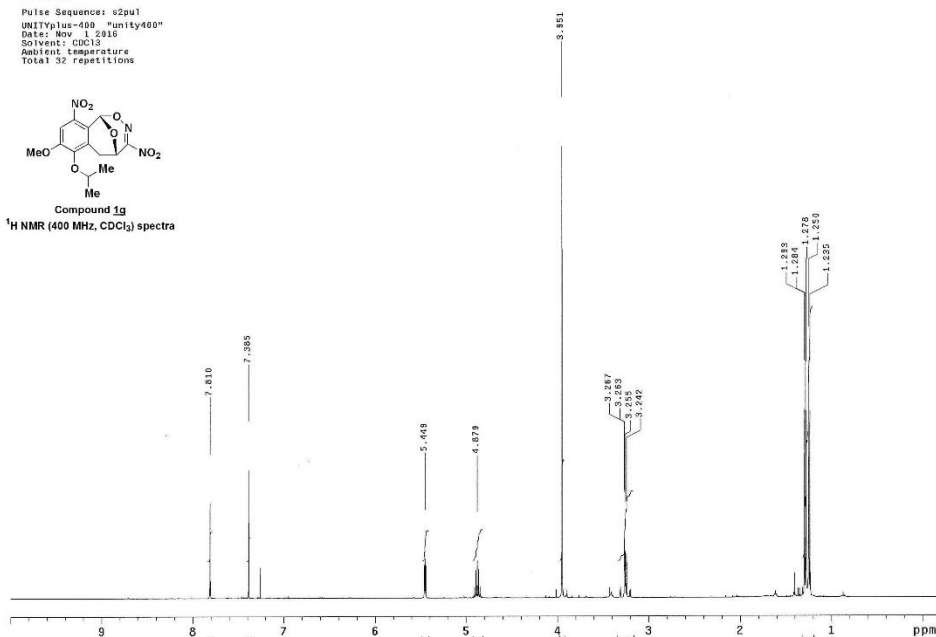

YL1051028  
Pulse Sequence: s2pu1  
UNITYplus-400 "unity400"  
Date: Nov 1 2016  
Solvent: CDCl3  
Ambient temperature  
Total 3280 repetitions

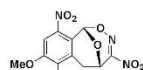

Compound 1g

<sup>13</sup>C NMR (100 MHz, CDCl<sub>3</sub>) spectra

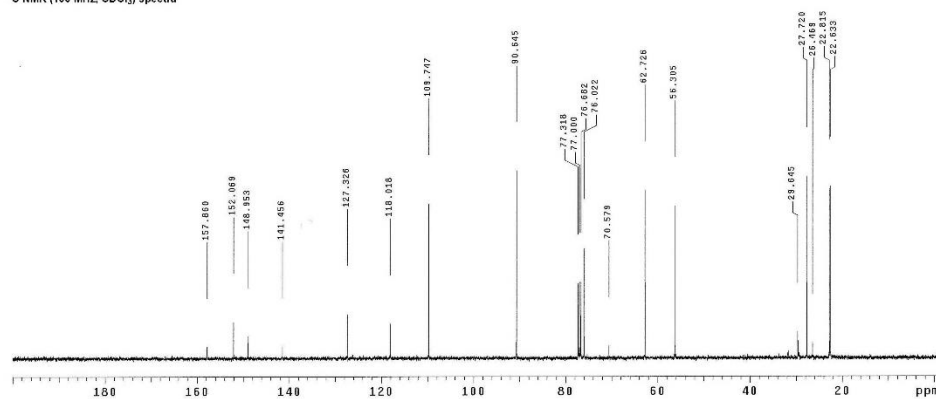

**Supplementary Figure S2.** <sup>1</sup>H (top) and <sup>13</sup>C (bottom) NMR spectra of SK1 (in CDCl<sub>3</sub>, 400/100 MHz).
